# Supplementary material for: Occurrence of Candidemia in Patients with COVID-19 Admitted to Five ICUs in France
Source: MDPI journal article supplement (doi:10.3390/jof8070678), 2022-06-28
Supplement: s1 [file s1]

**Table S1.** Characteristics of the study population

|                                                                     | Characteristics                                                         |                     | All patients (n = 264) |
|---------------------------------------------------------------------|-------------------------------------------------------------------------|---------------------|------------------------|
| Demographic characteristics and underlying conditions               | Age, median (IQR), year                                                 |                     | 56 (48-64)             |
|                                                                     | Male Gender, n (%)                                                      |                     | 186/264 (70.5)         |
|                                                                     | Body Mass Index > 25 kg/m², n (%)                                       |                     | 180/250 (72)           |
|                                                                     | Hypertension, n (%)                                                     |                     | 138/257 (53.7)         |
|                                                                     | Diabetes, n (%)                                                         |                     | 88/259 (34)            |
|                                                                     | Dyslipidemia, n (%)                                                     |                     | 50/258 (19.4)          |
|                                                                     | Active smoker, n (%)                                                    |                     | 18/249 (7.2)           |
| Preexisting risk factors for invasive fungal infection              | Hemopathy, n (%)                                                        |                     | 8/257 (3.1)            |
|                                                                     | Hematopoietic stem cell allografft, n (%)                               |                     | 3/257 (1.2)            |
|                                                                     | Solid organ transplant, n (%)                                           |                     | 18/257 (7)             |
|                                                                     | Corticosteroid therapy >0.3 mg/kg, n (%)                                |                     | 8/257 (3.1)            |
|                                                                     | HIV infection, n (%)                                                    |                     | 8/257 (3.1)            |
| Specific COVID-19 therapy                                           | HCQ, n (%)                                                              | HCQ                 | 61/245 (24.9)          |
|                                                                     |                                                                         | HCQ/AZT             | 10/245 (4)             |
|                                                                     | Antiviral, n (%)                                                        | Lopinavir/ritonavir | 30/245 (12.2)          |
|                                                                     |                                                                         | Remdesivir          | 18/245 (7.3)           |
|                                                                     |                                                                         | Oseltamivir         | 17/238 (7.1)           |
|                                                                     | Anti-IL6, n (%)                                                         | Tocilizumab         | 13/242 (5.4)           |
|                                                                     |                                                                         | Sarilumab           | 3/245 (1.2)            |
|                                                                     | Anti-IL1, n (%)                                                         |                     | 1/245 (0.4)            |
| Corticosteroid therapy related to COVID-19 and/or ICU stay          | Before ICU admission, n (%)                                             |                     | 41/234 (17.5)          |
|                                                                     | During ICU stay, n (%)                                                  |                     | 107/232 (46.1)         |
| ICU management and clinical characteristics, median (interquartile) | ICU stay (n=221), median (IQR), days                                    |                     | 30 (19-51)             |
|                                                                     | SAPS II score (n=196), median (IQR)                                     |                     | 55 (39-68)             |
|                                                                     | Intubation period (n=200), median (IQR), days                           |                     | 27 (15-45)             |
|                                                                     | Worst P/F (n = 251), median (IQR)                                       |                     | 60 (51-80)             |
|                                                                     | Extracorporeal membrane oxygenation, n (%)                              |                     | 153/244 (62.7)         |
|                                                                     | Vasopressor support (>0,5mg/h of noradrenalin), n (%)                   |                     | 172/233 (73.8)         |
|                                                                     | Dialysis, n (%)                                                         |                     | 75/234 (32)            |
| Inflammatory markers                                                | C-reactive protein (n=197), median (IQR), mg/L                          |                     | 171 (70-289)           |
|                                                                     | Ferritine (n=191), median (IQR), mg/L                                   |                     | 1753 (831-3271)        |
|                                                                     | IL-6 (n=66), median (IQR), pg/mL                                        |                     | 146 (44-564)           |
| Blood cultures                                                      | Total numbers of blood cultures sampled per patient, median [min ; max] |                     | 12 [0 ; 132]           |
|                                                                     | Positive blood cultures per patient, median [min ; max]                 |                     | 1 [0 ; 30]             |
| Overall mortality, n (%)                                            |                                                                         |                     | 105/244 (43)           |

Definition of abbreviations: IQR = interquartile range; HCQ= hydroxychloroquine; AZT = azithromycine; ICU= intensive care unit; SAPS = Simplified Acute Physiology Score; P/F = PaO<sub>2</sub>/FiO<sub>2</sub>
